# Supplementary material
Source: PubMed Central journal article supplement (PMC7045553)
Supplement: ao9b03789_si_001.pdf [file ao9b03789_si_001.pdf]

Beneficial effects of endophytic fungi from the *Anoectochilus* and *Ludisia* species on the growth and secondary metabolism of *Anoectochilus roxburghii*

Bingzhu Ye<sup>†#</sup>, Yanbin Wu<sup>‡#</sup>, Xin Zhai<sup>†#</sup>, Ruoqing Zhang<sup>§</sup>, Jinzhong Wu<sup>‡</sup>, Chao Zhang<sup>‡</sup>, Khalid Rahman<sup>⊥</sup>, Luping Qin<sup>†</sup>, Ting Han<sup>†\*</sup>, Chengjian Zheng<sup>†\*</sup>

<sup>†</sup>Department of Pharmacognosy, School of Pharmacy, Second Military Medical University, 325 Guohe Road, Shanghai 200433, China

<sup>‡</sup>School of Pharmacy, Fujian University of Traditional Chinese Medicine, 1 Qiuyang Road, Fuzhou 350122, China

<sup>§</sup>Department of Pharmacy, Tianjin Rehabilitation and Recuperation Center, Tianjin 3000191, China

<sup>⊥</sup>Faculty of Science, School of Pharmacy and Biomolecular Sciences, Liverpool John Moores University, Byrom Street, Liverpool L3 3AF, England, U.K.

\*Corresponding author:

*E-mail addresses:* zhengchengjian1984@126.com (C.-J. Zheng); Tel/fax: +86 21 81871308; *E-mail address:* than927@163.com (T. Han); Tel/fax: +86 21 81871306

# These authors contributed equally to this work.

## Tables and Figures Caption

Table S1. Information of collected samples of five *Anoectochilus* and one *Ludisia* species.

Table S2. Analysis of 227 isolates of endophytes from *Anoectochilus* and *Ludisia* species and their isolation information from different tissues

Table S3. Identification and GeneBank accessions of 53 strains of growth-promoting fungi

Table S4. Compositions of PCR reaction system (50  $\mu$ L)

Table S5. Parameters and process of PCR reaction

Table S6. Procedure of UPLC gradient program

Table S7. qRT-PCR primer sequences and GenBank accession numbers for tested genes in *A. roxburghii*

Figure S1. Plant structure of *Anoectochilus* and *Ludisia* species and representative isolated endophytic fungi

Figure S2. The effects of endophytic fungi on Arabidopsis roots (Ratio = treatment group/control; A, B. Root length; C, D. Lateral root number; E. The morphology on root hair formation in the root tip and root segment of Arabidopsis; Scale bars: 200  $\mu$ m.)

Table S1. Information of collected samples of five *Anoetochilus* and one *Ludisia* species.

| Samples no. | Species                 | Code | Location of collection |
|-------------|-------------------------|------|------------------------|
| 1           | <i>A. roxburghii</i>    | AR-1 | Guigang, Guangxi       |
| 2           | <i>A. roxburghii</i>    | AR-2 | Ganzhou, Jiangxi       |
| 3           | <i>A. roxburghii</i>    | AR-3 | Pingbian, Yunnan       |
| 4           | <i>A. burmannicus</i>   | AB-1 | Dehong, Yunnan         |
| 5           | <i>A. papillosus</i>    | AP-1 | Malipo, Yunnan         |
| 6           | <i>Ludisia discolor</i> | LD-1 | Nanning, Guangxi       |
| 7           | <i>A. lylei</i>         | AL-1 | Laibin, Guangxi        |
| 8           | <i>A. nandanensis</i>   | AN-1 | Nandan, Guangxi        |
| 9           | <i>A. roxburghii</i>    | AR-4 | Nanjing, Fujian        |
| 10          | <i>A. roxburghii</i>    | AR-5 | Nanping, Fujian        |

All samples are wild plants collected from difference provinces and cities in China (AR 1-5 Chinese name “Jinxianlian”).

Table S2. Analysis of 227 isolates of endophytes from *Anoectochilus* and *Ludisia* species and their isolation information from different tissues

| Code                  | Tissues of <i>Anoectochilus</i> and <i>Ludisia</i> |       |        |         | No. of isolates |
|-----------------------|----------------------------------------------------|-------|--------|---------|-----------------|
|                       | Roots                                              | Stems | Leaves | Flowers |                 |
| AR-1                  | 8                                                  | 6     | 7      | 0       | 21              |
| AR-2                  | 2                                                  | 1     | 2      | 2       | 7               |
| AR-3                  | 1                                                  | 1     | 3      | 0       | 5               |
| AB-1                  | 6                                                  | 9     | 13     | 0       | 28              |
| AP-1                  | 11                                                 | 5     | 11     | 0       | 27              |
| LD-1                  | 8                                                  | 11    | 8      | 0       | 27              |
| AL-1                  | 17                                                 | 1     | 27     | 0       | 45              |
| AN-1                  | 9                                                  | 26    | 19     | 0       | 54              |
| AR-4                  | 7                                                  | 27    | 14     | 0       | 48              |
| AR-5                  | 3                                                  | 4     | 8      | 0       | 15              |
| No. of total isolates | 72                                                 | 91    | 112    | 2       | 227             |

Table S3. Identification and GeneBank accessions of 53 strains of growth promoting  
fungi

| Code of fungi | Taxa of endophytes                | Host                             | Accession number<br>in GeneBank |
|---------------|-----------------------------------|----------------------------------|---------------------------------|
| J2            | <i>Bjerkandera adusta</i>         | <i>Anectochilus roxburhii</i>    | MH151056                        |
| J9            | <i>Chaetomium globosum</i>        | <i>Anectochilus roxburhii</i>    | MH151040                        |
| J13           | <i>Helminthosporium velutinum</i> | <i>Anectochilus roxburhii</i>    | MH151012                        |
| J19           | <i>Xylariaceae</i> sp.            | <i>Anectochilus roxburhii</i>    | MH151050                        |
| J22           | <i>Gliomastix polychroma</i>      | <i>Anectochilus roxburhii</i>    | MH151033                        |
| J24           | <i>Chaetomium murorum</i>         | <i>Anectochilus roxburhii</i>    | MH151020                        |
| J28           | <i>Gliomastix polychroma</i>      | <i>Anectochilus roxburhii</i>    | MH151023                        |
| J29           | <i>Fusarium solani</i>            | <i>Anectochilus roxburhii</i>    | MH151058                        |
| J30           | <i>Gliomastix polychroma</i>      | <i>Anectochilus roxburhii</i>    | MH151044                        |
| J31           | <i>Gliomastix polychroma</i>      | <i>Anectochilus roxburhii</i>    | MH151052                        |
| J32           | <i>colletotrichum</i> sp.         | <i>Anectochilus roxburhii</i>    | MH151018                        |
| J33           | <i>Chaetomium murorum</i>         | <i>Anectochilus roxburhii</i>    | MH151014                        |
| J35           | <i>colletotrichum</i> sp.         | <i>Anoectochilus burmannicus</i> | MH151013                        |
| J36           | <i>Fusarium solani</i>            | <i>Anoectochilus burmannicus</i> | MH151017                        |
| J41           | <i>Gliomastix polychroma</i>      | <i>Anoectochilus burmannicus</i> | MH151029                        |
| J46           | <i>Gliomastix polychroma</i>      | <i>Anoectochilus burmannicus</i> | MH151053                        |
| J69           | <i>Gliomastix polychroma</i>      | <i>Ludisia discolor</i>          | MH151028                        |
| J72           | <i>Glomerella cingulata</i>       | <i>Ludisia discolor</i>          | MH151037                        |
| J82           | <i>Gliomastix polychroma</i>      | <i>Ludisia discolor</i>          | MH151016                        |
| J86           | <i>Gliomastix polychroma</i>      | <i>Ludisia discolor</i>          | MH151024                        |
| J88           | <i>Hypoxyton</i> sp.              | <i>Ludisia discolor</i>          | MH151011                        |
| J90           | <i>Xylaria berteri</i>            | <i>Anoectochilus papillosus</i>  | MH151051                        |
| J91           | <i>Xylariaceae</i> sp.            | <i>Anoectochilus papillosus</i>  | MH151010                        |
| J108          | <i>Xylaria berteri</i>            | <i>Anoectochilus papillosus</i>  | MH151049                        |
| J112          | <i>Xylaria berteri</i>            | <i>Anoectochilus papillosus</i>  | MH151022                        |
| J116          | <i>Fusarium oxysporum</i>         | <i>Anoectochchilus lylei</i>     | MH151034                        |
| J118          | <i>Gliomastix polychroma</i>      | <i>Anoectochchilus lylei</i>     | MH151045                        |
| J125          | <i>colletotrichum</i> sp.         | <i>Anoectochchilus lylei</i>     | MH151047                        |
| J132          | <i>Xylaria berteri</i>            | <i>Anoectochchilus lylei</i>     | MH151036                        |
| J134          | <i>Gliomastix polychroma</i>      | <i>Anoectochchilus lylei</i>     | MH151026                        |
| J144          | <i>Fusarium oxysporum</i>         | <i>Anoectochchilus lylei</i>     | MH151038                        |
| J148          | <i>Fusarium</i> sp.               | <i>Anoectochchilus lylei</i>     | MH151032                        |
| J151          | <i>colletotrichum</i> sp .        | <i>Anoectochchilus lylei</i>     | MH151009                        |

---

|      |                                       |                                  |          |
|------|---------------------------------------|----------------------------------|----------|
| J153 | <i>colletotrichum</i> sp.             | <i>Anoectochchilus lylei</i>     | MH151031 |
| J160 | <i>Fusarium</i> sp.                   | <i>Anoectochchilus lylei</i>     | MH151042 |
| J162 | <i>Chaetomium globosum</i>            | <i>Anoectochilus nandanensis</i> | MH151027 |
| J166 | <i>Colletotrichum spaethianum</i>     | <i>Anoectochilus nandanensis</i> | MH151057 |
| J182 | <i>Fusarium oxysporum</i>             | <i>Anoectochilus nandanensis</i> | MH151025 |
| J189 | <i>Chaetomium murorum</i>             | <i>Anoectochilus nandanensis</i> | MH151015 |
| J193 | <i>Phomopsis</i> sp.                  | <i>Anoectochilus nandanensis</i> | MH151048 |
| J198 | <i>Chaetomium murorum</i>             | <i>Anoectochilus nandanensis</i> | MH151046 |
| J209 | <i>Auricularia polytricha</i>         | <i>Anoectochilus nandanensis</i> | MH151043 |
| J210 | <i>Auricularia polytricha</i>         | <i>Anoectochilus nandanensis</i> | MH151041 |
| J211 | <i>Colletotrichum gloeosporioides</i> | <i>Anoectochilus nandanensis</i> | MH151021 |
| J212 | <i>Auricularia polytricha</i>         | <i>Anoectochilus nandanensis</i> | MH151030 |
| J221 | <i>Diaporthe eres</i>                 | <i>Anectochilus roxburhii</i>    | MH151039 |
| J223 | <i>Colletotrichum</i> sp.             | <i>Anectochilus roxburhii</i>    | MH151054 |
| J224 | <i>Xylariaceae</i> sp.                | <i>Anectochilus roxburhii</i>    | MH151019 |
| J248 | <i>Xylariaceae</i> sp.                | <i>Anectochilus roxburhii</i>    | MH151035 |
| J261 | <i>Colletotrichum magnisporum</i>     | <i>Anectochilus roxburhii</i>    | MH151055 |
| J94  | <i>unknown</i>                        | <i>Anoectochilus papillosus</i>  |          |
| J105 | <i>unknown</i>                        | <i>Anoectochilus papillosus</i>  |          |
| J218 | <i>unknown</i>                        | <i>Anectochilus roxburhii</i>    |          |

---

Table S4. Compositions of PCR reaction system (50.0  $\mu\text{L}$ )

| Composition                      | Volume             |
|----------------------------------|--------------------|
| DNA template                     | 2.0 $\mu\text{L}$  |
| Primer ITS4                      | 1.0 $\mu\text{L}$  |
| Primer ITS5                      | 1.0 $\mu\text{L}$  |
| 2 $\times$ TransTap PCR SuperMix | 25.0 $\mu\text{L}$ |
| ddH <sub>2</sub> O               | 21.0 $\mu\text{L}$ |

Table S5. Parameters and process of PCR reaction

| Procedure                                       | Temperature(°C) | time  |
|-------------------------------------------------|-----------------|-------|
| 1.Initial denaturation                          | 94              | 4 min |
| 2. Degeneration                                 | 94              | 50s   |
| 3. Annealing                                    | 54              | 50s   |
| 4. Elongation                                   | 72              | 90 s  |
| 5. Degeneration-Annealing-Elongation, 30 cycles |                 |       |
| 6. Elongation                                   | 72              | 7 min |
| 7. Finish                                       | 4               | ∞     |



Table S6. Procedure of UPLC gradient program

| Time(min) | Acetonitrile(%) | 0.1% formic acid in water(%) |
|-----------|-----------------|------------------------------|
| 0         | 10              | 90                           |
| 1         | 11              | 89                           |
| 6         | 20              | 80                           |
| 9         | 35              | 65                           |
| 13        | 33              | 67                           |
| 15        | 37              | 63                           |
| 18        | 65              | 35                           |
| 19        | 10              | 90                           |

Table S7. qRT-PCR primer sequences and GenBank accession numbers for tested

genes in *A. roxburghii*

| Gene name                               | Primer sequence (5'-3')                             | Accession |
|-----------------------------------------|-----------------------------------------------------|-----------|
| Uracil phosphoribosyl<br>transferase    | F: AGAGTGCAATGGCAGAGCTT<br>R: AATCGTCACAGGCTCCCTTG  | GR410424  |
| Amino acid transmembrane<br>transporter | F: GGTCGATCGCCGGAGTTATT<br>R: AGCACGATAGAGCGCTACAC  | GR410425  |
| Maturase K                              | F: TGCCGGAATTCTGGTCATCC<br>R: AGGATCCGCTGTGATAACGAC | GR410426  |

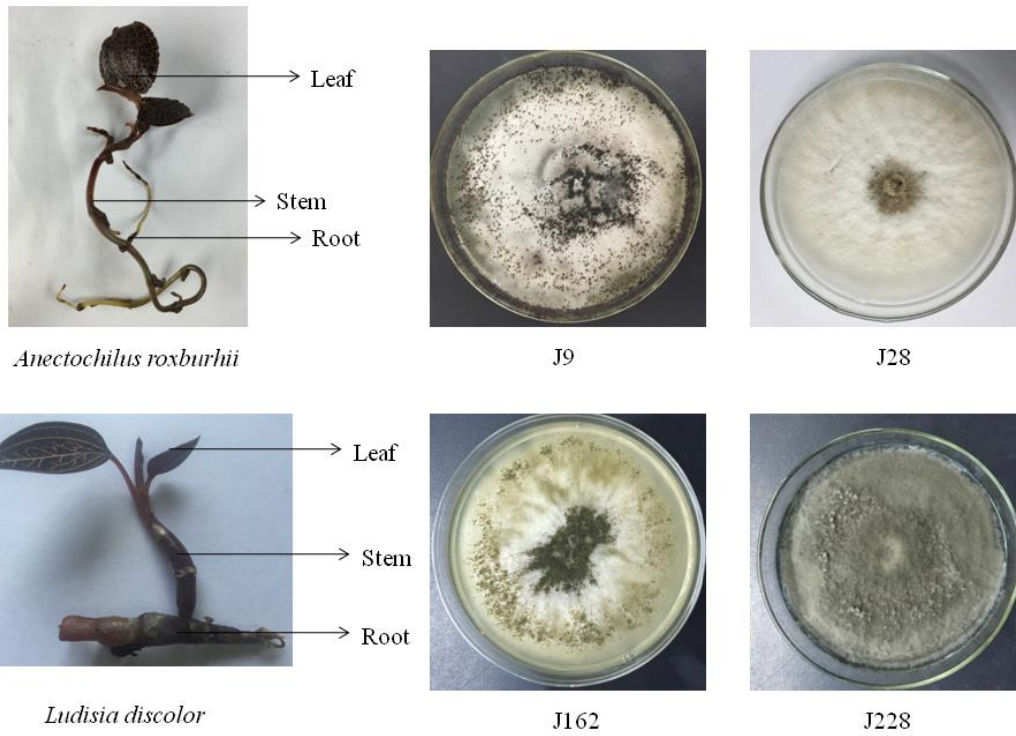

Figure S1. Plant structure of *Anectochilus* and *Ludisia* species and representative isolated endophytic fungi

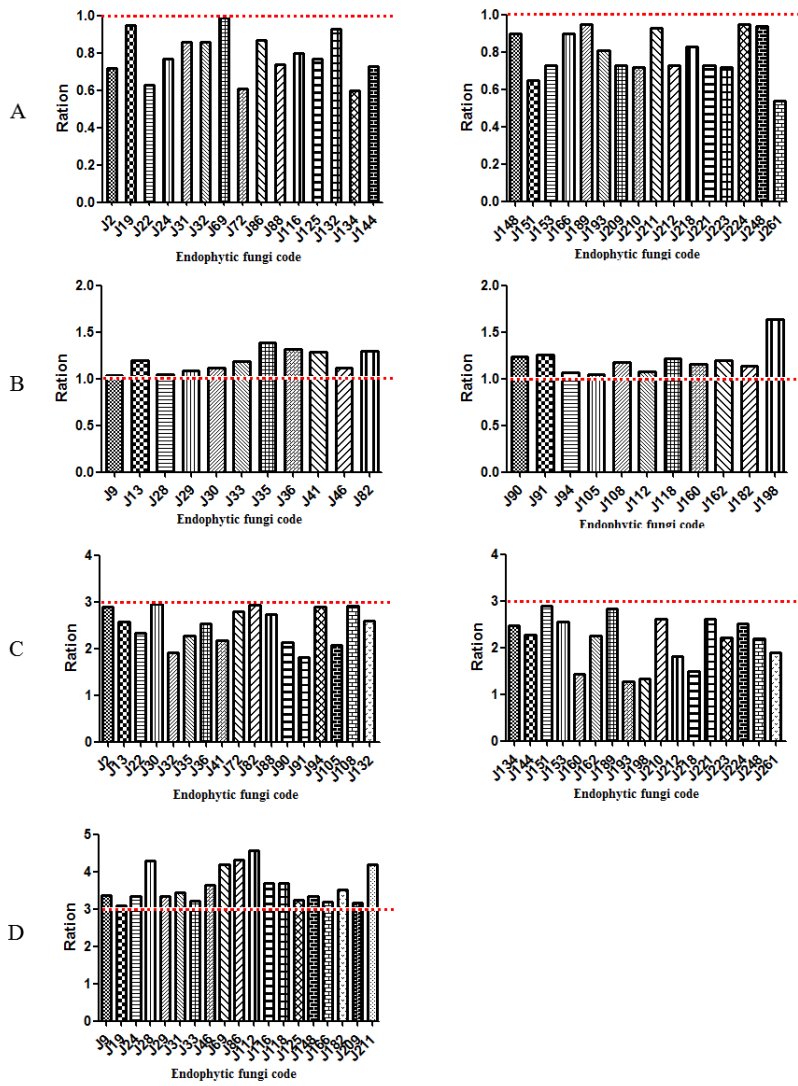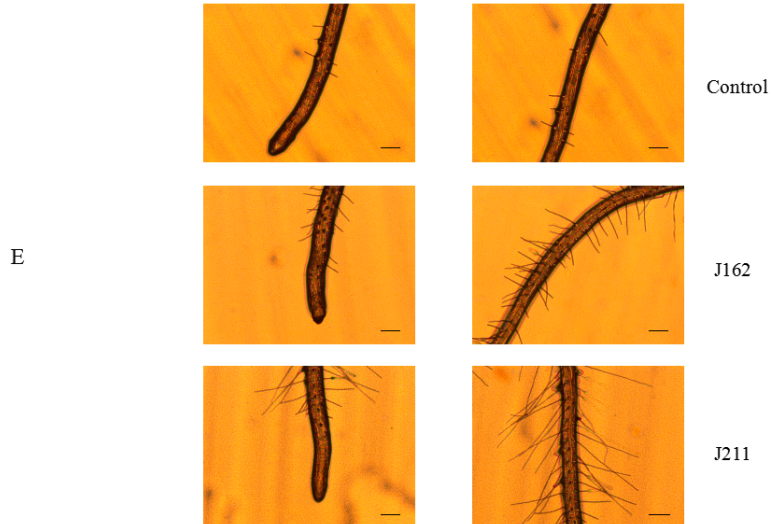

Figure S2. Effects of endophytic fungi on *Arabidopsis* roots (Ratio = treatment group/control; A, B. Root length; C, D. Lateral root number; E. The morphology on root hair formation in the root tip and root segment of *Arabidopsis*; Scale bars: 200  $\mu\text{m}$ .)
